# Supplementary material
Source: ML conference proceedings conference paper supplement (https://proceedings.neurips.cc/paper_files/paper/2019/hash/254ed7d2de3b23ab10936522dd547b78-Abstract.html)
Supplement: Supplementary file [file 254ed7d2de3b23ab10936522dd547b78-Supplemental.zip]

---

# Supplementary Material: Modeling Tabular data using Conditional GAN

---

Lei Xu    Maria Skoularidou    Alfredo Cuesta-Infante    Kalyan Veeramachaneni

## 1 Dataset Details

The statistical information of simulated and real data is in Table 1. The raw data of 8 real datasets are available online.

- Adult: <http://archive.ics.uci.edu/ml/datasets/adult>
- Census: <https://archive.ics.uci.edu/ml/datasets/census+income>
- Covertypes: <https://archive.ics.uci.edu/ml/datasets/covertypes>
- Credit: <https://www.kaggle.com/mlg-ulb/creditcardfraud>
- Intrusion: <http://archive.ics.uci.edu/ml/datasets/kdd+cup+1999+data>
- MNIST: <http://yann.lecun.com/exdb/mnist/index.html>
- News: <https://archive.ics.uci.edu/ml/datasets/online+news+popularity>

For each dataset, we select a few classifiers or regressors which give reasonable performance on such dataset shown in Table 2.

Table 1: Datasets in our benchmark.

| Simulated Data |             |    |    |    | Real Data  |             |    |     |    |      |
|----------------|-------------|----|----|----|------------|-------------|----|-----|----|------|
| name           | #train/test | #C | #B | #M | name       | #train/test | #C | #B  | #M | task |
| grid           | 10k/10k     | 2  | 0  | 0  | adult      | 23k/10k     | 6  | 2   | 7  | C    |
| gridr          | 10k/10k     | 2  | 0  | 0  | census     | 200k/100k   | 7  | 3   | 31 | C    |
| ring           | 10k/10k     | 2  | 0  | 0  | covertypes | 481k/100k   | 10 | 44  | 1  | C    |
| asia           | 10k/10k     | 0  | 8  | 0  | credit     | 264k/20k    | 29 | 1   | 0  | C    |
| alarm          | 10k/10k     | 0  | 13 | 24 | intrusion  | 394k/100k   | 26 | 5   | 10 | C    |
| child          | 10k/10k     | 0  | 8  | 12 | mnist12    | 60k/10k     | 0  | 144 | 1  | C    |
| insurance      | 10k/10k     | 0  | 8  | 19 | mnist28    | 60k/10k     | 0  | 784 | 1  | C    |
|                |             |    |    |    | news       | 31k/8k      | 45 | 14  | 0  | R    |

#C, #B, and #M mean number of continuous columns, binary columns and multi-class discrete columns respectively. C and R in task mean classification and regression respectively.

Table 2: Classifiers and regressors selected for each real dataset and corresponding performance.

| dataset   | name                     | accuracy | f1     | macro_f1 | micro_f1 | r2     |
|-----------|--------------------------|----------|--------|----------|----------|--------|
| adult     | Adaboost (estimator=50)  | 86.07%   | 68.03% |          |          |        |
|           | Decision Tree (depth=20) | 79.84%   | 65.77% |          |          |        |
|           | Logistic Regression      | 79.53%   | 66.06% |          |          |        |
|           | MLP (50)                 | 85.06%   | 67.57% |          |          |        |
| census    | Adaboost (estimator=50)  | 95.22%   | 50.75% |          |          |        |
|           | Decision Tree (depth=30) | 90.57%   | 44.97% |          |          |        |
|           | MLP (100)                | 94.30%   | 52.43% |          |          |        |
| covtype   | Decision Tree (depth=30) | 82.25%   |        | 73.62%   | 82.25%   |        |
|           | MLP (100)                | 70.06%   |        | 56.78%   | 70.06%   |        |
| credit    | Adaboost (estimator=50)  | 99.93%   | 76.00% |          |          |        |
|           | Decision Tree (depth=30) | 99.89%   | 66.67% |          |          |        |
|           | MLP (100)                | 99.92%   | 73.31% |          |          |        |
| intrusion | Decision Tree (depth=30) | 99.91%   |        | 85.82%   | 99.91%   |        |
|           | MLP (100)                | 99.93%   |        | 86.65%   | 99.93%   |        |
| mnist12   | Decision Tree (depth=30) | 84.10%   |        | 83.88%   | 84.10%   |        |
|           | Logistic Regression      | 87.29%   |        | 87.11%   | 87.29%   |        |
|           | MLP (100)                | 94.40%   |        | 94.34%   | 94.40%   |        |
| mnist28   | Decision Tree (depth=30) | 86.08%   |        | 85.89%   | 86.08%   |        |
|           | Logistic Regression      | 91.42%   |        | 91.29%   | 91.42%   |        |
|           | MLP (100)                | 97.28%   |        | 97.26%   | 97.28%   |        |
| news      | Linear Regression        |          |        |          |          | 0.1390 |
|           | MLP (100)                |          |        |          |          | 0.1492 |

Table 3: Benchmark results over three sets of experiments, namely Gaussian mixture simulated data, Bayesian network simulated data, and real data. The number in the bracket is the rank of a method (lower better). It is computed as follows: For each set of experiment, (1) rank algorithms over all metrics in each set. (2) Take the average of all ranks of each algorithm. Get one score in range [1, 7] for each algorithm. (3) Rank the score again.

| method      | grid                |                      | gridr               |                      | ring                |                      |
|-------------|---------------------|----------------------|---------------------|----------------------|---------------------|----------------------|
|             | $\mathcal{L}_{syn}$ | $\mathcal{L}_{test}$ | $\mathcal{L}_{syn}$ | $\mathcal{L}_{test}$ | $\mathcal{L}_{syn}$ | $\mathcal{L}_{test}$ |
| Identity    | -3.06               | -3.06                | -3.06               | -3.07                | -1.70               | -1.70                |
| CLBN(2)     | -3.68               | -8.62                | -3.76               | -11.60               | -1.75               | <b>-1.70</b>         |
| PrivBN(4)   | -4.33               | -21.67               | -3.98               | -13.88               | -1.82               | -1.71                |
| MedGAN(7)   | -10.04              | -62.93               | -9.45               | -72.00               | -2.32               | -45.16               |
| VEEGAN(6)   | -9.81               | -4.79                | -12.51              | -4.94                | -7.85               | -2.92                |
| TableGAN(5) | -8.70               | -4.99                | -9.64               | -4.70                | -6.38               | -2.66                |
| TVAE(1)     | <b>-2.86</b>        | -11.26               | <b>-3.41</b>        | <b>-3.20</b>         | <b>-1.68</b>        | -1.79                |
| TVAE(3)     | -5.63               | <b>-3.69</b>         | -8.11               | -4.31                | -3.43               | -2.19                |

  

| method      | asia                |                      | alarm               |                      | child               |                      | insurance           |                      |
|-------------|---------------------|----------------------|---------------------|----------------------|---------------------|----------------------|---------------------|----------------------|
|             | $\mathcal{L}_{syn}$ | $\mathcal{L}_{test}$ | $\mathcal{L}_{syn}$ | $\mathcal{L}_{test}$ | $\mathcal{L}_{syn}$ | $\mathcal{L}_{test}$ | $\mathcal{L}_{syn}$ | $\mathcal{L}_{test}$ |
| Identity    | -2.23               | -2.24                | -10.3               | -10.3                | -12.0               | -12.0                | -12.8               | -12.9                |
| CLBN(3)     | -2.44               | -2.27                | -12.4               | -11.2                | -12.6               | -12.3                | -15.2               | -13.9                |
| PrivBN(1)   | <b>-2.28</b>        | <b>-2.24</b>         | -11.9               | -10.9                | -12.3               | <b>-12.2</b>         | -14.7               | <b>-13.6</b>         |
| MedGAN(5)   | -2.81               | -2.59                | <b>-10.9</b>        | -14.2                | -14.2               | -15.4                | -16.4               | -16.4                |
| VEEGAN(7)   | -8.11               | -4.63                | -17.7               | -14.9                | -17.6               | -17.8                | -18.2               | -18.1                |
| TableGAN(6) | -3.64               | -2.77                | -12.7               | -11.5                | -15.0               | -13.3                | -16.0               | -14.3                |
| TVAE(2)     | -2.31               | -2.27                | -11.2               | <b>-10.7</b>         | <b>-12.3</b>        | -12.3                | <b>-14.7</b>        | -14.2                |
| TGAN(4)     | -2.56               | -2.31                | -14.2               | -12.6                | -13.4               | -12.7                | -16.5               | -14.8                |

  

| method      | adult        | census       | credit       | cover.       | intru.       | mnist12/28   | news         |              |
|-------------|--------------|--------------|--------------|--------------|--------------|--------------|--------------|--------------|
|             | F1           | F1           | F1           | Macro        | Macro        | Acc          | Acc          | $R^2$        |
| Identity    | 0.669        | 0.494        | 0.720        | 0.652        | 0.862        | 0.886        | 0.916        | 0.14         |
| CLBN(3)     | 0.334        | 0.310        | 0.409        | 0.319        | 0.384        | 0.741        | 0.176        | -6.28        |
| PrivBN(4)   | 0.414        | 0.121        | 0.185        | 0.270        | 0.384        | 0.117        | 0.081        | -4.49        |
| MedGAN(6)   | 0.375        | 0.000        | 0.000        | 0.093        | 0.299        | 0.091        | 0.104        | -8.80        |
| VEEGAN(6)   | 0.235        | 0.094        | 0.000        | 0.082        | 0.261        | 0.194        | 0.136        | -6.5e6       |
| TableGAN(5) | 0.492        | 0.358        | 0.182        | 0.000        | 0.000        | 0.100        | 0.000        | -3.09        |
| TVAE(1)     | <b>0.626</b> | 0.377        | 0.098        | <b>0.433</b> | 0.511        | <b>0.793</b> | <b>0.794</b> | <b>-0.20</b> |
| TGAN(1)     | 0.601        | <b>0.391</b> | <b>0.672</b> | 0.324        | <b>0.528</b> | 0.394        | 0.371        | -0.43        |

---

**Algorithm 1:** Train CTGAN on step.

---

**Input:** Training data  $\mathbf{T}_{train}$ , Conditional generator and Critic parameters  $\Phi_G$  and  $\Phi_C$  respectively, batch size  $m$ , pac size  $pac$ .

**Result:** Conditional generator and Critic parameters  $\Phi_G$ ,  $\Phi_C$  updated.

- 1 Create masks  $\{\mathbf{m}_1, \dots, \mathbf{m}_{i^*}, \dots, \mathbf{m}_{N_d}\}_j$ , for  $1 \leq j \leq m$
  - 2 Create condition vectors  $cond_j$ , for  $1 \leq j \leq m$  from masks ▷ Create  $m$  conditional vectors
  - 3 Sample  $\{z_j\} \sim \text{MVN}(0, \mathbf{I})$ , for  $1 \leq j \leq m$
  - 4  $\hat{\mathbf{r}}_j \leftarrow \text{Generator}(z_j, cond_j)$ , for  $1 \leq j \leq m$  ▷ Generate fake data
  - 5 Sample  $\mathbf{r}_j \sim \text{Uniform}(\mathbf{T}_{train}|cond_j)$ , for  $1 \leq j \leq m$  ▷ Get real data
  - 6  $cond_k^{(pac)} \leftarrow cond_{k \times pac+1} \oplus \dots \oplus cond_{k \times pac+pac}$ , for  $1 \leq k \leq m/pac$  ▷ Conditional vector pacs
  - 7  $\hat{\mathbf{r}}_k^{(pac)} \leftarrow \hat{\mathbf{r}}_{k \times pac+1} \oplus \dots \oplus \hat{\mathbf{r}}_{k \times pac+pac}$ , for  $1 \leq k \leq m/pac$  ▷ Fake data pacs
  - 8  $\mathbf{r}_k^{(pac)} \leftarrow \mathbf{r}_{k \times pac+1} \oplus \dots \oplus \mathbf{r}_{k \times pac+pac}$ , for  $1 \leq k \leq m/pac$  ▷ Real data pacs
  - 9  $\mathcal{L}_C \leftarrow \frac{1}{m/pac} \sum_{k=1}^{m/pac} \text{Critic}(\hat{\mathbf{r}}_k^{(pac)}, cond_k^{(pac)}) - \frac{1}{m/pac} \sum_{k=1}^{m/pac} \text{Critic}(\mathbf{r}_k^{(pac)}, cond_k^{(pac)})$
  - 10 Sample  $\rho_1, \dots, \rho_{m/pac} \sim \text{Uniform}(0, 1)$
  - 11  $\tilde{\mathbf{r}}_k^{(pac)} \leftarrow \rho_k \hat{\mathbf{r}}_k^{(pac)} + (1 - \rho_k) \mathbf{r}_k^{(pac)}$ , for  $1 \leq k \leq m/pac$
  - 12  $\mathcal{L}_{GP} \leftarrow \frac{1}{m/pac} \sum_{k=1}^{m/pac} (||\nabla_{\tilde{\mathbf{r}}_k^{(pac)}} \text{Critic}(\tilde{\mathbf{r}}_k^{(pac)}, cond_k^{(pac)})||_2 - 1)^2$  ▷ Gradient Penalty
  - 13  $\Phi_C \leftarrow \Phi_C - 0.0002 \times \text{Adam}(\nabla_{\Phi_C}(\mathcal{L}_C + 10\mathcal{L}_{GP}))$
  - 14 Regenerate  $\hat{\mathbf{r}}_j$  following lines 1 to 7
  - 15  $\mathcal{L}_G \leftarrow -\frac{1}{m/pac} \sum_{k=1}^{m/pac} \text{Critic}(\hat{\mathbf{r}}_k^{(pac)}, cond_k^{(pac)}) + \frac{1}{m} \sum_{j=1}^m \text{CrossEntropy}(\hat{\mathbf{d}}_{i^*,j}, \mathbf{m}_{i^*})$
  - 16  $\Phi_G \leftarrow \Phi_G - 0.0002 \times \text{Adam}(\nabla_{\Phi_G} \mathcal{L}_G)$
-
